# Supplementary material for: Metal–semiconductor–metal ternary heteronanocrystals with multiple plasmonic effects for efficient photocatalysis
Source: Royal Society of Chemistry journal article supplement (doi:10.1039/d2ta07415j), 2022-12-13
Supplement: d2ta07415j1.pdf [file d2ta07415j1.pdf]

Electronic supplementary information (ESI) for

**Metal–Semiconductor–Metal Ternary Heteronanocrystals with Multiple Plasmonic Effects for Efficient Photocatalysis**

Dae Han Wi,<sup>‡a</sup> Hyunwoo Yang,<sup>‡a</sup> Yonghyeon Kim,<sup>‡a</sup> Hojin Ahn,<sup>a</sup> Jong Wook Hong,<sup>\*b</sup> and Sang Woo Han<sup>\*a</sup>

<sup>a</sup>Center for Nanotectonics, Department of Chemistry and KI for the NanoCentury, KAIST, Daejeon 34141, Korea. E-mail: sangwoohan@kaist.ac.kr

<sup>b</sup>Department of Chemistry, University of Ulsan, Ulsan 44776, Korea. E-mail: jwhong@ulsan.ac.kr

<sup>‡</sup>These authors contributed equally to this work.

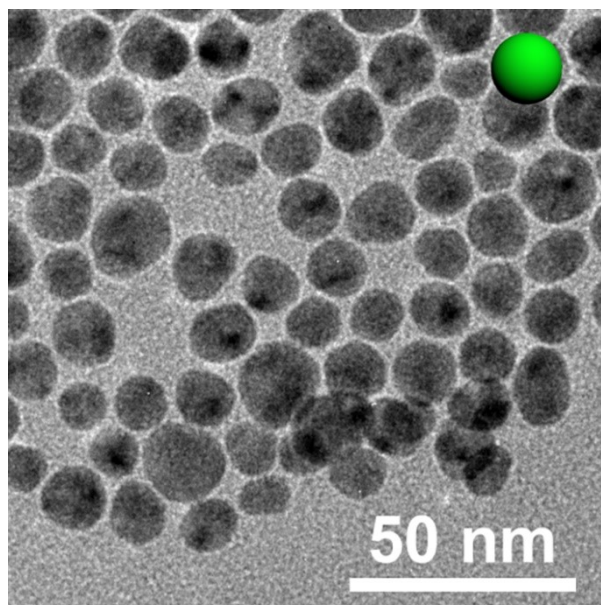

**Fig. S1** TEM image of Ag NCs. Inset shows a three-dimensional geometric model of Ag NCs. The average size of Ag NCs was  $11.9 \pm 1.5$  nm.

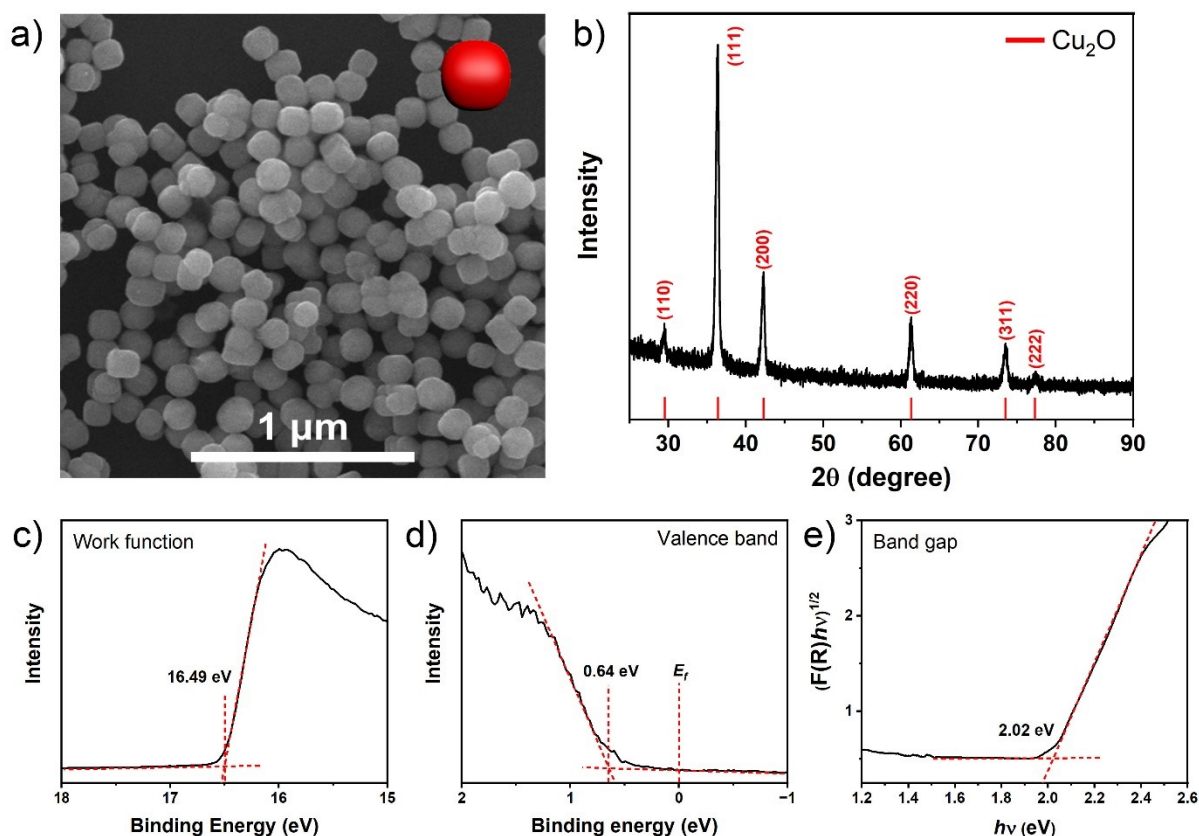

**Fig. S2** (a) SEM image of  $\text{Cu}_2\text{O}$  NCs. Inset shows a three-dimensional geometric model of  $\text{Cu}_2\text{O}$  NCs. The average size of  $\text{Cu}_2\text{O}$  NCs was  $123 \pm 9$  nm. (b) XRD pattern of  $\text{Cu}_2\text{O}$  NCs. The positions of  $\text{Cu}_2\text{O}$  reference were taken from the ICDD database (00-005-0667). The XRD pattern corroborates the cuprite structure of  $\text{Cu}_2\text{O}$  NCs. Ultraviolet photoelectron spectroscopy spectra of  $\text{Cu}_2\text{O}$  NCs for the estimation of their (c) work function and (d) valence band position. The work function of  $\text{Cu}_2\text{O}$  NCs was calculated to be 4.71 eV [incident photon energy (21.2 eV) – secondary electron cut-off (16.49 eV)], and the valence band position of  $\text{Cu}_2\text{O}$  NCs was 0.64 eV with respect to the Fermi level ( $E_f$ ). (e) Tauc plot of  $\text{Cu}_2\text{O}$  NCs obtained with diffuse reflectance spectroscopy measurements. The band gap energy of  $\text{Cu}_2\text{O}$  NCs was estimated to be 2.02 eV. Accordingly, the conduction band position of  $\text{Cu}_2\text{O}$  NCs was calculated to be 3.33 eV.

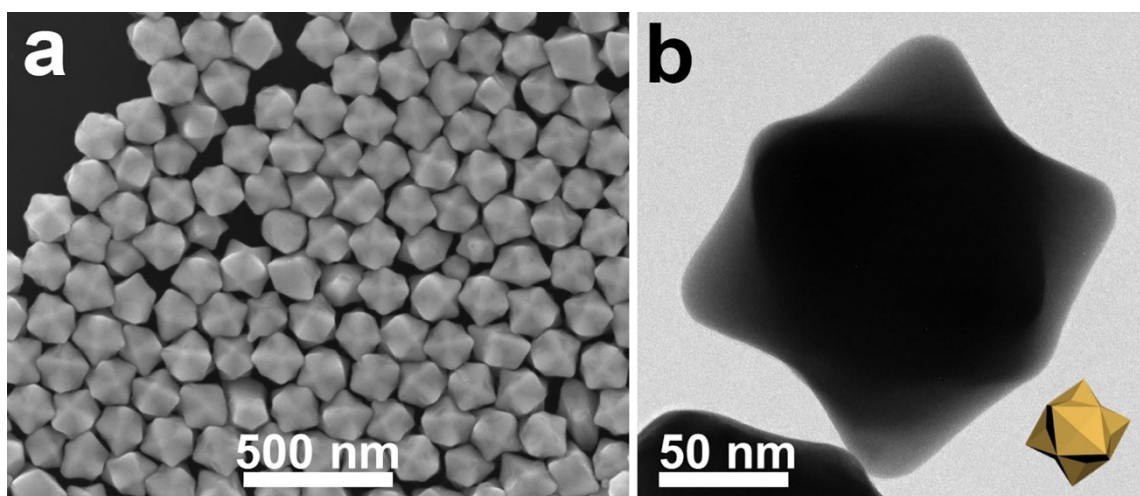

**Fig. S3** (a) SEM and (b) TEM images of HOH Au NCs. Inset in b shows a three-dimensional geometric model of HOH Au NCs. The SEM-determined average size of HOH Au NCs was  $136 \pm 6$  nm.

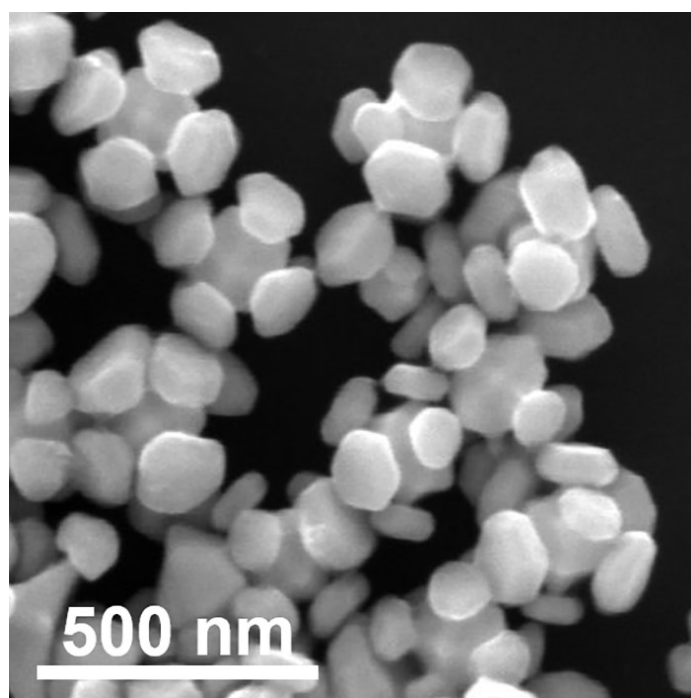

**Fig. S4** SEM image of  $\text{Au}_{\text{vertex}}\text{-Ag}$  HNCs prepared by the reduction of  $\text{AgNO}_3$  on HOH Au NCs in the presence of PVP.

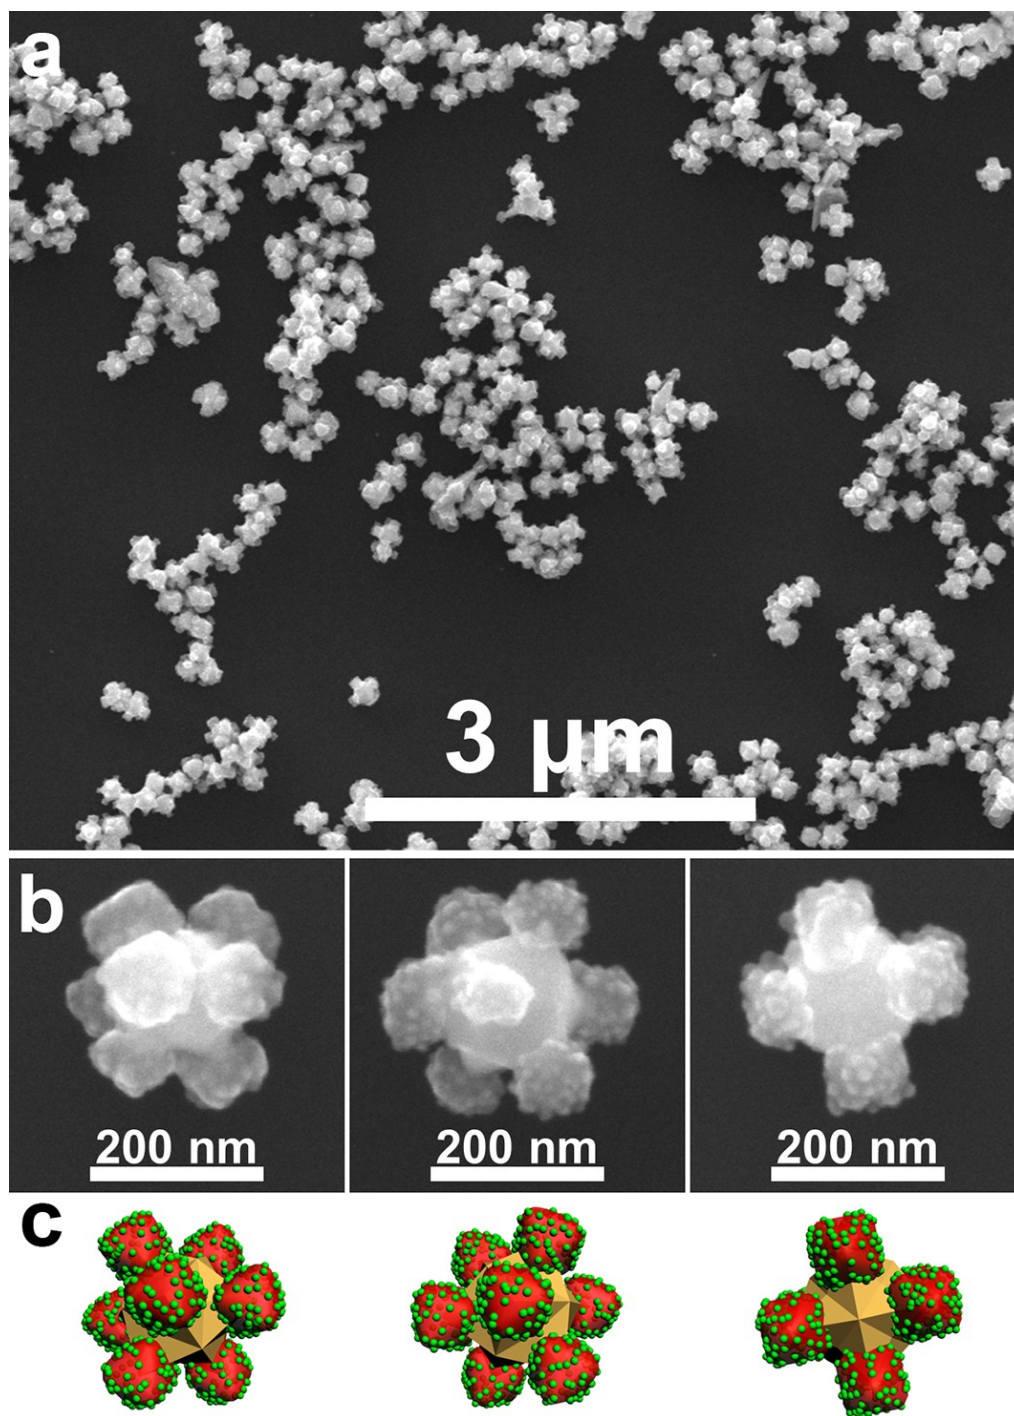

**Fig. S5** (a) Low-magnification SEM image of  $\text{Au}_{\text{vertex}}\text{-Cu}_2\text{O-Ag}$  HNCs. (b) High-magnification SEM images and (c) corresponding three-dimensional geometric models of  $\text{Au}_{\text{vertex}}\text{-Cu}_2\text{O-Ag}$  HNCs viewed along different directions.

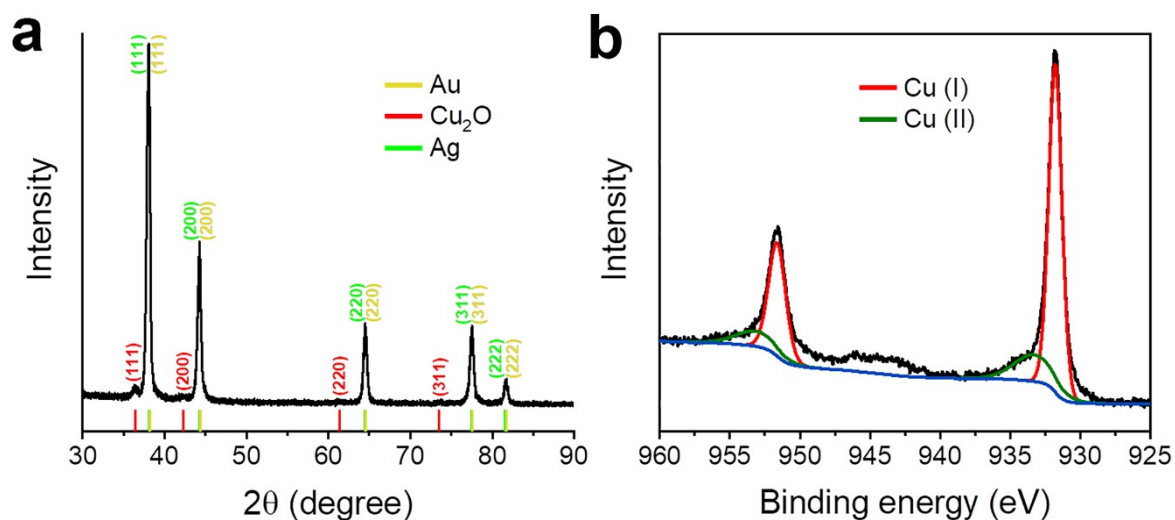

**Fig. S6** (a) XRD pattern of Au<sub>vertex</sub>-Cu<sub>2</sub>O-Ag HNCs. The positions of Au, Cu<sub>2</sub>O, and Ag references were taken from the ICDD database (Au: 00-004-0784, Cu<sub>2</sub>O: 00-005-0667, Ag: 00-004-0783). (b) Cu 2p XPS spectrum of Au<sub>vertex</sub>-Cu<sub>2</sub>O-Ag HNCs.

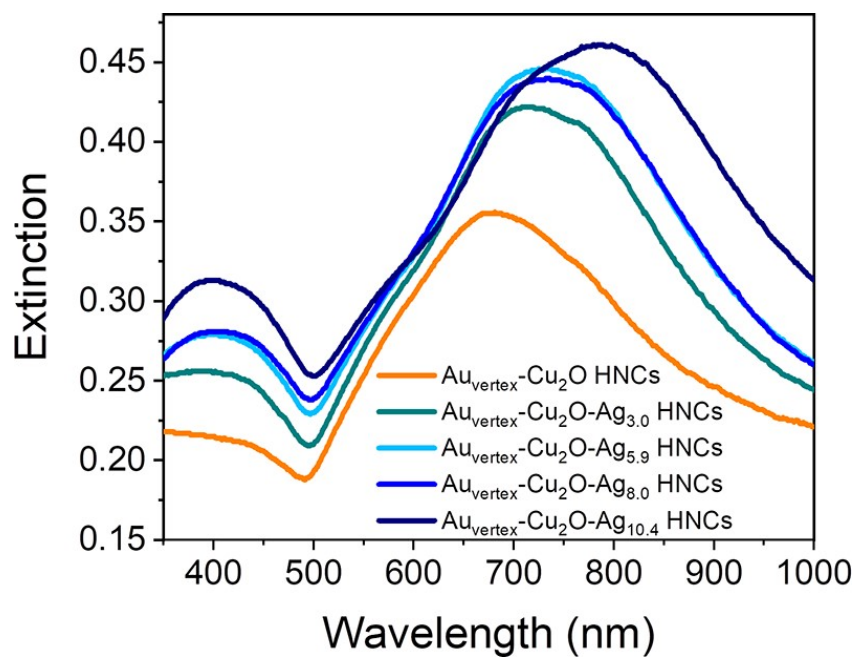

**Fig. S7** Extinction spectra of Au<sub>vertex</sub>-Cu<sub>2</sub>O and Au<sub>vertex</sub>-Cu<sub>2</sub>O-Ag HNCs.

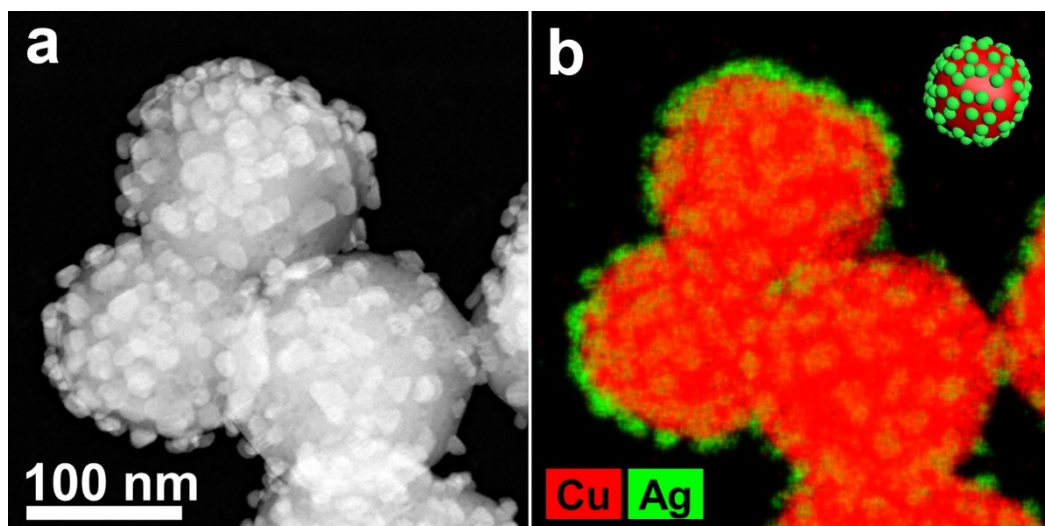

**Fig. S8** (a) HADDF-STEM and (b) corresponding EDS elemental mapping images of Cu<sub>2</sub>O-Ag HNCs. Inset in b shows a three-dimensional geometric model of Cu<sub>2</sub>O-Ag HNCs.

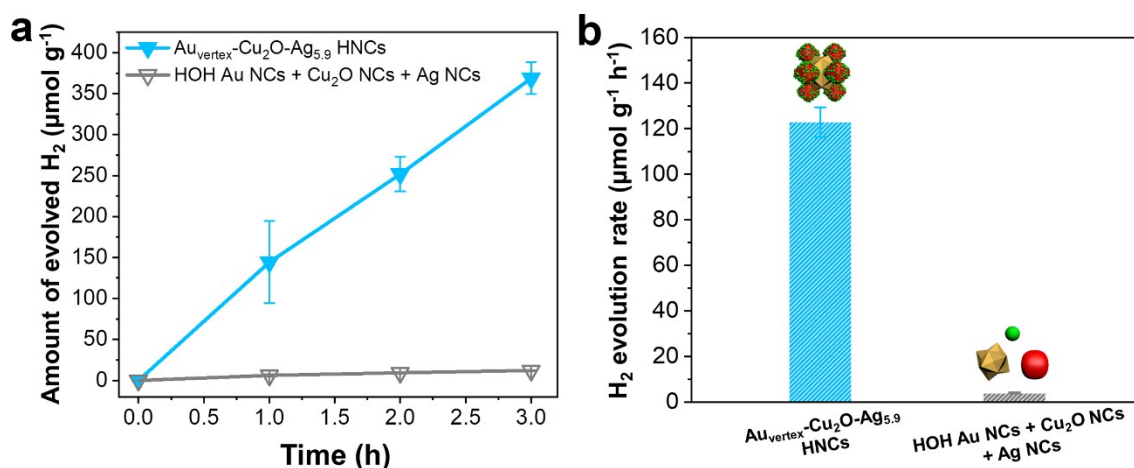

**Fig. S9** (a) Amounts of  $H_2$  evolved during the photocatalysis and (b) corresponding  $H_2$  evolution rates obtained with  $\text{Au}_{\text{vertex}}\text{-Cu}_2\text{O-Ag}_{5.9}$  HNCs and a physical mixture of HOH Au NCs, Ag NCs, and  $\text{Cu}_2\text{O}$  NCs.

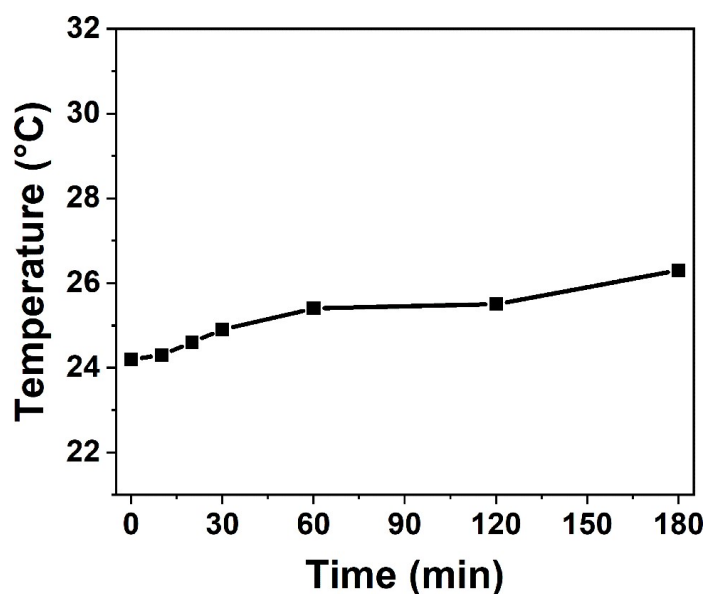

**Fig. S10** Temperature of the reaction mixture during the photocatalysis for  $\text{Au}_{\text{vertex}}\text{-Cu}_2\text{O-Ag}_{5.9}$  HNCs. The temperature was measured by inserting a thermometer (Summit Inc., TPI-330L) into the reaction cell.

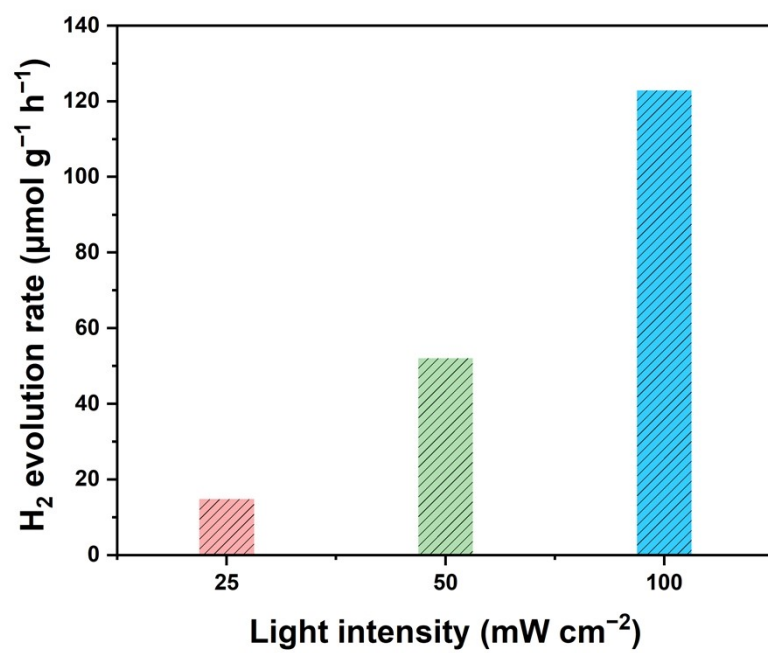

**Fig. S11** Light intensity-dependent H<sub>2</sub> evolution rates of Au<sub>vertex</sub>-Cu<sub>2</sub>O-Ag<sub>5.9</sub> HNCs.

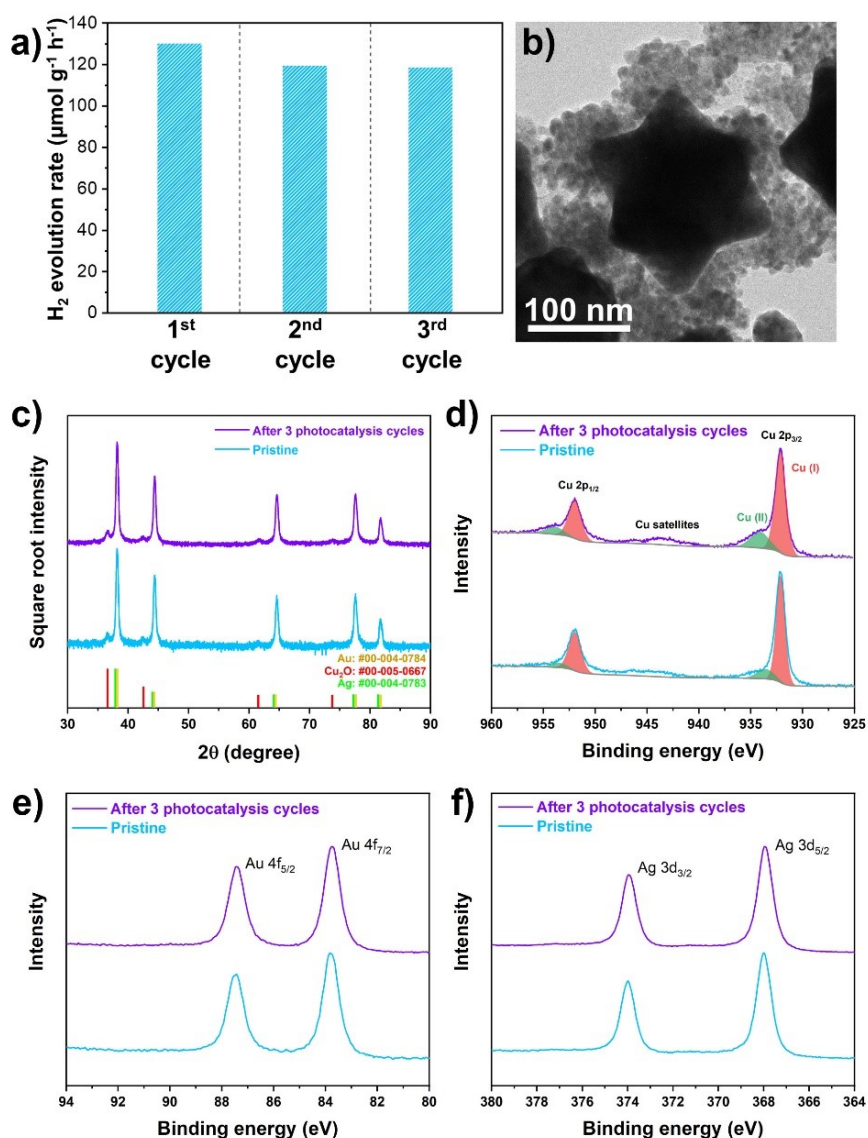

**Fig. S12** (a) Recyclability of  $\text{Au}_{\text{vertex}}\text{-Cu}_2\text{O-Ag}_{5.9}$  HNCs for photocatalytic  $\text{H}_2$  evolution. Each photocatalysis cycle was conducted for 3 h. After each photocatalysis cycle, the catalysts were collected from the reaction solution by centrifuging and redispersed in a fresh aqueous methanol solution for the next photocatalysis cycle. The  $\text{Au}_{\text{vertex}}\text{-Cu}_2\text{O-Ag}_{5.9}$  HNCs exhibited 91%  $\text{H}_2$  evolution activity in the third cycle relative to that in the first cycle. The slight decrease in the activity during the recyclability test can be attributed to the loss of catalysts during the recollection process. (b) TEM image of  $\text{Au}_{\text{vertex}}\text{-Cu}_2\text{O-Ag}_{5.9}$  HNCs obtained after the recyclability test, demonstrating no significant change in the morphology of the HNCs after the reaction. (c) XRD patterns and (d) Cu 2p XPS spectra of  $\text{Au}_{\text{vertex}}\text{-Cu}_2\text{O-Ag}_{5.9}$  HNCs before and after the recyclability test. (e) Au 4f and (f) Ag 3d XPS spectra of  $\text{Au}_{\text{vertex}}\text{-Cu}_2\text{O-Ag}_{5.9}$  HNCs before and after the recyclability test.

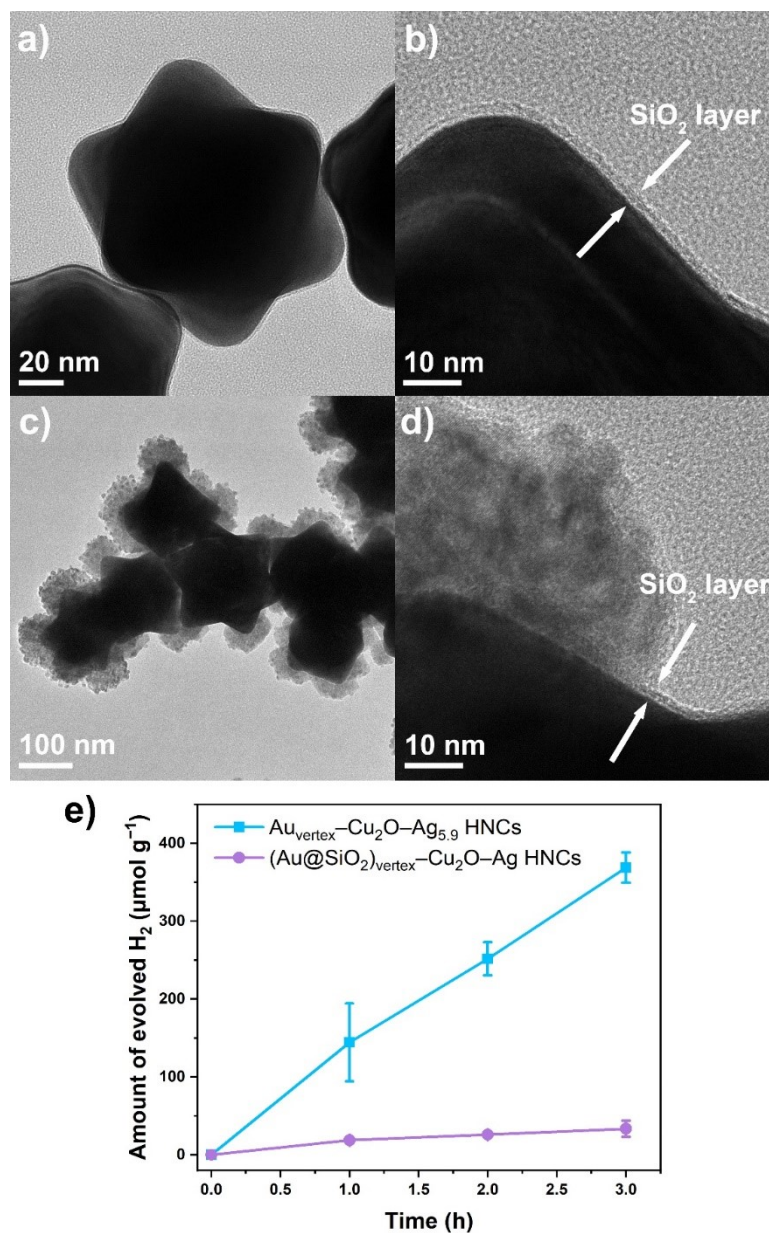

**Fig. S13.** TEM images of (a,b) HOH Au@SiO<sub>2</sub> core-shell NCs and (c,d) (Au@SiO<sub>2</sub>)<sub>vertex</sub>-Cu<sub>2</sub>O-Ag HNCs. (e) Amounts of H<sub>2</sub> evolved during the photocatalysis with Au<sub>vertex</sub>-Cu<sub>2</sub>O-Ag<sub>5.9</sub> and (Au@SiO<sub>2</sub>)<sub>vertex</sub>-Cu<sub>2</sub>O-Ag HNCs, which were normalized to the total mass of catalysts.

**Table S1.** Photocatalytic H<sub>2</sub> evolution rates of various Cu<sub>2</sub>O-based photocatalysts.

| Photocatalyst                                                  | Solvent                               | Light source               | H <sub>2</sub> evolution rate (μmol g <sup>-1</sup> h <sup>-1</sup> ) | Reference                                                    |
|----------------------------------------------------------------|---------------------------------------|----------------------------|-----------------------------------------------------------------------|--------------------------------------------------------------|
| Cu <sub>2</sub> O cubes                                        | 0.5 M Na <sub>2</sub> SO <sub>3</sub> | 300 W Xe lamp              | 4.6                                                                   | <i>Angew. Chem. Int. Ed.</i> , 2018, <b>57</b> , 13613–13617 |
| Multifaceted Cu <sub>2</sub> O                                 | 0.0125 M glucose + 0.1M NaOH          | 300 W Xe lamp (λ > 420 nm) | 18.83                                                                 | <i>Chem. Commun.</i> , 2014, <b>50</b> , 192–194             |
| Octahedral hexapod Cu <sub>2</sub> O                           | pure water                            | 300 W Xe lamp              | 7.14                                                                  | <i>CrystEngComm</i> , 2010, <b>12</b> , 406–412              |
| Pd/Cu <sub>2</sub> O cubes                                     | pure water                            | 300 W Xe lamp (λ > 400 nm) | 2.20                                                                  | <i>Angew. Chem. Int. Ed.</i> , 2014, <b>53</b> , 5107–5111   |
| Au <sub>vertex</sub> -Cu <sub>2</sub> O HNCs                   | 25 v/v% methanol                      | 300 W Xe lamp (λ > 400 nm) | 28.87                                                                 | <i>J. Am. Chem. Soc.</i> , 2016, <b>138</b> , 15766–15773    |
| Hot dog-Au NR@Cu <sub>2</sub> O@TiO <sub>2</sub>               | 0.01 M NaOH + 0.0125 M glucose        | 300 W Xe lamp              | 105.1                                                                 | <i>Nano Energy</i> , 2017, <b>33</b> , 469–475               |
| Au <sub>vertex</sub> -Cu <sub>2</sub> O-Ag <sub>5,9</sub> HNCs | 25 v/v% methanol                      | 300 W Xe lamp (λ > 400 nm) | 122.93                                                                | <b>This work</b>                                             |
